# Supplementary material
Source: publisher figshare collection journal article supplement (https://gsapubs.figshare.com/ndownloader/files/30620388)
Supplement: Supplementary file 1 [file 30620388]

## Sheet: Sheet1
Table S8. DATA SOURCES FOR FIGURES 8, 10, 11, 12, AND 14
Figure 8
Breitsprecher, K., and Mortensen, J.K., 2004, BC Age 2004A-1: a database of isotopic age determinations for rock units from British Columbia: British Columbia Geological Survey, 2004-03.
Church, B.N., 1995, Bridge River mining camp geology and mineral deposits: British Columbia Geological Survey Branch, Paper 1995-3, 159 p.
du Bray, E.A., and Dellinger, D.A., 1988, Potassium-argon ages for plutons in the eastern and southern Sierra Nevada batholith, California: United States Geological Survey Bulletin 1799, 10 p.
Evernden, J.F., and Kistler, R.W., 1970, Chronology of emplacement of Mesozoic batholithic complexes in California and western Nevada: United States Geological Survey Professional Paper 623, 42 p.
Friedman, R.M., and Armstrong, R.L., 1995, Jurassic and Cretaceous geochronology of the southern Coast Belt, British Columbia, 49° to 51°N, in Miller, D.M., and Busby, C., eds., Jurassic Magmatism and Tectonics of the North American Cordillera: Boulder, Colorado: Geological Society of America Special Paper 299, p. 95–139.
Garver, J.I., Archbald, D.A., and Van Order, W.F., Jr., 1994, Late Cretaceous to Paleogene cooling adjacent to strike-slip faults in the Bridge River area, southern British Columbia, based on fission-track and 40Ar-39Ar analyses, in Cordillera and Pacific Margin: Geological Survey of Canada, Current Research, 1994-A, p. 177–183, doi:10.4095/193636.
Grove, M., Lovera, O., and Harrison, M., 2003, Late Cretaceous cooling of the east-central Peninsular Ranges batholith (33°N): relationship to La Posta pluton emplacement, Laramide shallow subduction, and forearc sedimentation: Geological Society of America Special Paper 374, 26 p., doi:10.1130/0-8137-2374-4.355.
Hart, C.J.R., Goldfarb, R.J., Ullrich, T.D., and Friedman, R., 2008, Gold, granites, and geochronology: timing of formation of the Bralorne-Pioneer gold orebodies and the Bendor batholith, southwestern British Columbia (NTS 092J/15), in Geoscience BC, Summary of Activities 2007: Geoscience BC, Report 2008, p. 47–54.
Hillhouse, J.W., and Grommé, S., 2011, Updated paleomagnetic pole from the Cretaceous plutonic rocks of the Sierra Nevada, California: tectonic displacement of the Sierra Nevada block: Lithosphere, v. 3, no. 4, p. 275–288, doi:10.1130/L142.1.
Hunt, P.A., and Roddick, J.C., 1994, A compilation of K-Ar and 40Ar/39Ar ages: Report 24; in Radiogenic Age and Isotopic Studies: Report 8: Geological Survey of Canada, 1994-F, p. 125–155.
Irving, E., Baker, J., Wright, N., Yorath, C.J., Enkin, R.J., and York, D., 1995, Magmatism and age of the Porteau Pluton, southern Coast Belt, British Columbia: evidence for tilt and translation: Canadian Journal of Earth Sciences, v. 32, p. 380–392.
Kistler, R.W., and Peterman, Z.E., 1978, Reconstruction of crustal blocks of California on the basis of initial strontium isotopic compositions of Mesozoic granitic rocks: United States Geological Survey Professional Paper 1071, 17 p.
Kistler, R.W., and Ross, D.C., 1990, A strontium isotopic study of plutons and associated rocks of the southern Sierra Nevada and vicinity, California: U.S. Geological Survey Bulletin 1920, 20 p.
McLeod, J.A., Vining, M., and McTaggart, K.C., 1976, Note on the age of the Giant Mascot ultramafic body, near Hope, B.C.: Canadian Journal of Earth Sciences, v. 13, p. 1152–1154.
Nadin, E.S., Saleeby, J., and Wong, M., 2016, Thermal evolution of the Sierra Nevada batholith, California, and implications for strain localization: Geosphere, v. 12, no. 2, p. 377–399, doi:10.1130/GEOS01224.1.
Ortega-Rivera, A., 2003, Geochronological constraints on the tectonic history of the Peninsular Ranges batholith of Alta and Baja California: tectonic implications for western México, in Johnson, S.E., Paterson, S.R., Fletcher, J.M., Girty, G.H., Kimbrough, D.L., and Martín-Barajas, A., eds., Tectonic Evolution of Northwestern México and the Southwestern USA: Boulder, Colorado, Geological Society…
Richards, T.A., and McTaggart, K.C., 1976, Granitic rocks of the southern Coast Plutonic Complex and northern Cascades of British Columbia: Geological Society of America Bulletin, v. 87, p. 935–953.
Saleeby, J., Farley, K.A., Kistler, R.W., and Fleck, R.J., 2007, thermal evolution and exhumation of deep-level batholithic exposures, southernmost Sierra Nevada, California, in Cloos, M., Carlson, W.D., Gilbert, M.C., Liou, J.G., and Sorensen, S.S., eds., Convergent Margin Terranes and Associated Regions: A Tribute to W.G. Ernst: Geological Society of America Special Paper 419, p. 39–66, doi:10.…
Schiarizza, P., Gaba, R.G., Glover, J.K., Garver, J.I., and Umhoefer, P.J., 1997, Geology and mineral occurrences of the Taseko-Bridge River area: British Columbia Geological Survey Bulletin, v. 100, 291 p.
Shulaker, D.Z., Grove, M., Hourigan, J.K., and Sharman, G.R., 2019, Constraints on the Cenozoic exhumation history of the southern Sierra Nevada and NW Mojave desert region using basement and detrital thermochronology: Geological Society of America Abstracts with Programs, v. 49, doi:10.1130/abs/2017CD-292911.
Wanless, R.K., Stevens, R.D., Lachance, G.R., and Rimsaite, J.Y.H., 1965, Age determinations and geological studies, Part 1 - isotopic ages, report 5: Geological Survey of Canada, Paper 64-17, 126 p.
Wanless, R.K., Stevens, R.D., Lachance, G.R., and Delabio, R.N., 1979, Age determinations and geological studies, K-Ar isotopic ages, report 14: Geological Survey of Canada, Paper 79-2, 67 p.
Figures 10, 11, and 12
Armstrong, R.L., and Suppe, J., 1973, Potassium-argon geochronometry of Mesozoic igneous rocks in Nevada, Utah, and southern California: Geological Society of America Bulletin, v. 84, p. 1375–1392.
Armstrong, R.L., Taubeneck, W.H., and Hales, P.O., 1977, Rb-Sr and K-Ar geochronology of Mesozoic granitic rocks and their SR isotopic compositions, Oregon, Washington, and Idaho: Geological Society of America Bulletin, v. 88, p. 397–411.
Bateman, P.C., and Wones, D.R., 1972, Huntington Lake quadrangle, central Sierra Nevada, California—analytical data: United States Geological Survey Professional Paper 724-A, 18 p.
Berry, R.A., 2015, Hornblende as an Indicator of Magma Batches and Magmatic Processes in the English Peak Pluton, Klamath Mountains, California [Ph.D. thesis]: Lubbock, Texas Tech University, 201 p.
Davis, J.W., 2010, Thermochronology and cooling histories of plutons: implications for incremental pluton assembly [Ph.D. thesis]: Chapel Hill, University of North Carolina at Chapel Hill, 119 p.
Davis, J.W., Coleman, D.S., Gracely, J.T., Gaschnig, R., and Stearns, M., 2012, Magma accumulation rates and thermal histories of plutons of the Sierra Nevada batholith, CA: Contributions to Mineralogy and Petrology, v. 163, p. 449–465.
DeWitt, E., Armstrong, R.L., Sutter, J.F., and Zartman, R.E., 1984, U-Th-Pb, Rb-Sr, and Ar-Ar mineral and whole-rock isotopic systematics in a metamorphosed granitic terrane, southeastern California: Geological Society of America Bulletin, v. 95, p. 723–739.
DeWitt, E., Foord, E.E., Zartman, R.E., Pearson, R.C., and Foster, F., 1996, Chronology of Late Cretaceous Igneous and Hydrothermal Events at the Golden Sunlight Gold-Silver Breccia Pipe, Southwestern Montana: United States Geological Survey Bulletin, v. 2155, 48 p.
du Bray, E.A., and Dellinger, D.A., 1988, Potassium-Argon Ages for Plutons in the Eastern and Southern Sierra Nevada Batholith, California: United States Geological Survey Bulletin, v. 1799, 10 p.
Evernden, J.F., and Kistler, R.W., 1970, Chronology of emplacement of Mesozoic batholithic complexes in California and western Nevada: United States Geological Survey Professional Paper, v. 623, 42 p.
Foster, D.A., 1989, Mesozoic and Cenozoic thermal history of the eastern Mojave Desert, California and Western Arizona, with emphasis on the Old Woman Mountains area and the Chemehuevi Metamorphic Core Complex [Ph.D. thesis], Albany, State University of New York at Albany, 329 p.
Foster, D.A., Harrison, T.M., and Miller, C.F., 1989, Age, inheritance, and uplift of the Old Woman-Piute batholith, California and implications for K-feldspar age spectra: The Journal of Geology, v. 97, no. 2, p. 232–243.
Foster, D.A., Harrison, T.M., Miller, C.F., and Howard, K.A., 1990, The 40Ar/39Ar Thermochronology of the Eastern Mojave Desert, California, and Adjacent Western Arizona with Implications of the Evolution of Metamorphic Core Complexes: Journal of Geophysical Research, v. 95, no. B12, p. 20,005–20,2024.
Foster, D.A., Miller, C.F., Harrison, T.M., and Hoisch, T.D., 1992, 40Ar/39Ar thermochronology and thermobarometry of metamorphism, plutonism, and tectonic denudation in the Old Woman Mountains area, California: Geological Society of America Bulletin, v. 104, p. 176–191.
Foster, D.A., Grice Jr., W.C., and Kalakay, T.J., 2010, Extension of the Anaconda metamorphic core complex: 40Ar/39Ar thermochronology and implications for Eocene tectonics of the northern Rocky Mountains and the Boulder batholith: Lithosphere, v. 2, no. 4, p. 232–246, doi:10.1130/L94.1.
Gaschnig, R.M., Macho, A.S., Fayon, A., Schmitz, M., Ware, B.D., Vervoort, J.D., Kelso, P., LaMaskin, T.A., Kahn, M.J., and Tikoff, B., 2017, Intrusive and depositional constraints on the Cretaceous tectonic history of the southern Blue Mountains, eastern Oregon: Lithosphere, v. 9, no. 2, p. 265–282, doi:10.1130/L554.1.
Grove, M., Jacobson, C.E., Barth, A.P., and Vucic, A., 2003, Temporal and spatial trends of Late Cretaceous–early Tertiary underplating of Pelona and related schist beneath southern California and southwestern Arizona. Geological Society of America Special Paper, v. 374, p. 381–406.
Hacker, B.R., and Ernst, W.G., 1993, Jurassic orogeny in the Klamath Mountains: A geochronological analysis, in Dunn, G., and McDougall, K., eds., Mesozoic Paleogeography of the Western United States-II: Pacific Section SEMP, v. 71, p. 37–60.
Harper, G.D., Saleeby, J.B., and Heizler, M., 1994, Formation and emplacement of the Josephine ophiolite and the Nevadan orogeny in the Klamath Mountains, California-Oregon: U/Pb zircon and 40Ar/39Ar geochronology: Journal of Geophysical Research, v. 99, no. B3, p. 4293–4221.
Hart, C.J.R., Goldfarb, R.J., Ullrich, T.D., and Friedman, R., 2008, Gold, Granites and Geochronology: Timing of Formation of the Bralorne-Pioneer Gold Orebodies and the Bendor Batholith, southwestern British Columbia, NTS 092J/15, in Geoscience BC, Summary of Activities 2007: Geoscience BC, Report 2008-1, p. 47–54.
Hillhouse, J.W., and Grommé, S., 2011, Updated paleomagnetic pole from the Cretaceous plutonic rocks of the Sierra Nevada, California: Tectonic displacement of the Sierra Nevada block: Lithosphere, v. 3, no. 4, p. 275–288, doi:10.1130/L142.1.
Hotz, P.E., 1971, Plutonic Rocks of the Klamath Mountains, California and Oregon: United States Geological Survey Professional Paper, v. 684-B, 20 p.
Irwin, W.P., 1985, Age and Tectonics of Plutonic Belts in Accreted Terranes of the Klamath Mountains, California and Oregon, in Tectonostratigraphic terranes of the circum-Pacific region: Circumpacific Council for Energy and Mineral Resources, p. 187–199.
Kirkpatrick, J.D., Dobson, K.J., Mark, D.F., Shipton, Z.K., Brodsky, E.E., and Stuart, F.M., 2012, The depth of pseudotachylyte formation from detailed thermochronology and constraints on coseismic stress drop variability: Journal of Geophysical Research, v. 117, B06406, doi:10.1029/2011JB008846.
Kistler, R.W., Bateman, P.C., and Brannock, W.W., 1965, Isotopic Ages of Minerals from Granitic Rocks of the Central Sierra Nevada and Inyo Mountains, California: Geological Society of America Bulletin, v. 76, no. 2, p. 155–164.
Kistler, R.W., and Dodge, F.C.W., 1966, Potassium-argon ages of coexisting minerals from pyroxene-bearing granitic rocks in the Sierra Nevada, California. Journal of Geophysical Research, v. 71, no. 8, p. 2157–2161, doi:10.1029/JZ071i008p02157
Kistler, R.W., and Peterman, Z.E., 1978, Reconstruction of Crustal Blocks Of California on the Basis of Initial Strontium Isotopic Compositions Of Mesozoic Granitic Rocks. United States Geological Survey Professional Paper, v. 1071, 17 p.
Kistler, R.W., and Ross, D.C., 1990, A strontium isotopic study of plutons and associated rocks of the southern Sierra Nevada and vicinity, California: U.S. Geological Survey Bulletin, v. 1920, 20 p.
Krummenacher, D., Gastil, R.G., Bushee, J., and Doupont, J., 1975, K-Ar Apparent Ages, Peninsular Ranges Batholith, Southern California and Baja California: Geological Society of America Bulletin, v. 86, p. 760–768.
Lund, K., Aleinikoff, J.N., Kunk, M.J., Unruh, D.M., Zeihen, G.D., Hodges, W.C., du Bray, E.A., and O’Neill, J.M., 2002, SHRIMP U-Pb and 40Ar/39Ar Age Constraints for Relating Plutonism and Mineralization in the Boulder Batholith Region, Montana: Economic Geology, v. 97, p. 241–267.
Marvin, R.F., Mehnert, H.H., and Naeser, C.W., 1989, U.S. Geological Survey radiometric ages—Compilation “C”, Part three—California and Nevada: Isochron/West, v. 52, p. 3–12.
McNulty, B.A., 1995, Shear zone development during magmatic arc construction: The Bench Canyon shear zone, central Sierra Nevada, California: Geological Society of America Bulletin, v. 107, p. 1094–1107.
Memeti, V., Paterson, S.R., Matzel, J., Mundil, R., and Okaya, D., 2010, Magmatic lobes as “snapshots” of magma chamber growth and evolution in large, composite batholiths: an example from the Tuolumne Intrusion, Sierra Nevada, CA: Geological Society of America Bulletin, v. 122, no. 11-12, p. 1912–1931, doi:10.1130/B30004.1.
Miggins, D.P., Premo, W.R., Snee, L.W., Yeoman, R., Naeser, N.D., Naeser, C.W., and Morton, D.M., 2014, Thermochronology of Cretaceous batholithic rocks in the northern Peninsular Ranges batholith, southern California: Implications for the Late Cretaceous tectonic evolution of southern California, in Morton, D.M., and Miller, F.K., eds., Peninsular Ranges Batholith, Baja California and Southern C…
Miller, F.K., and Engels, J.C., 1975, Distribution and Trends of Discordant Ages of the Plutonic Rocks of Northeastern Washington and Northern Idaho: Geological Society of America Bulletin, v. 86, p. 517–528.
Miller E.L., and Sutter, J.F., 1981, 40Ar/39Ar age spectra for biotite and hornblende from plutonic rocks in the Victorville region, California: Geological Society of America Bulletin, v. 92, no, 1, p. 164–169.
Miller, F.K., Morton, D.M., Morton, J.L., and Miller, D.M., 2014, A Compilation of K-Ar-ages for Southern California: U.S. Geological Survey, Open File Report, 2014-1195, 3 p., doi:10.3133/ofr20141195.
Nadin, E.S., Saleeby, J., and Wong, M., 2016, Thermal evolution of the Sierra Nevada batholith, California, and implications for strain localization: Geosphere, v. 12, no. 2, p. 377–399, doi:10.1130/GEOS01224.1.
Naibert, T.J., Geissman, J.W., and Heizler, M.T., 2010, Magnetic fabric, paleomagnetic, and 40Ar/39Ar geochronologic data bearing on the emplacement of the Late Cretaceous Philipsburg Batholith, SW Montana fold-and-thrust belt: Lithosphere, v. 2, no. 5, p. 303–327, doi:10.1130/L83.1.
Ortega-Rivera, A., Farrar, E., Hanes, J.A., Archibald, D.A., Gastil, R.G., Kimbrough, D.L., Zentilli, M., Lopez-Martinez, M., Feraud, G., and Ruffet, G., 1997, Chronological constraints on the thermal and tilting history of the Sierra San Pedro Martir pluton, Baja California, Mexico, from U/Pb, 40Ar/39Ar, and fission-track geochronology: Geological Society of America Bulletin, v. 109, no. 6, p. 7…
Ortega-Rivera, A., 2003, Geochronological constraints on the tectonic history of the Peninsular Ranges batholith of Alta and Baja California: Tectonic implications for western Mexico, in Johnson, S.E., Paterson, S.R., Fletcher, J.M., Girty, G.H., Kimbrough, D.L., and Martín-Barajas, A., eds., Tectonic evolution of northwestern México and the southwestern USA: Boulder, Colorado: Geological Society…
Robinson, A.C., and Kistler, R.W., 1986, Maps showing isotopic dating in the Walker Lake 1° by 2° quadrangle, California and Nevada: United States Geological Survey Miscellaneous Field Studies Map, MF-1382-N.
Saleeby, J., Farley, K.A., Kistler, R.W., and Fleck, R.J., 2007, Thermal evolution and exhumation of deep-level batholithic exposures, southernmost Sierra Nevada, California, in Cloos, M., Carlson, W.D., Gilbert, M.C., Liou, J.G., and Sorensen, S.S., eds., Convergent Margin Terranes and Associated Regions: A Tribute to W.G. Ernst: Geological Society of America Special Paper, v. 419, p. 39–66, doi…
Sharp, W.D., Tobisch, O.T., and Renne, P.R., 2000, Development of Cretaceous transpressional cleavage synchronous with batholith emplacement, central Sierra Nevada, California: Geological Society of America Bulletin, v. 112, p. 1059–1066.
Snee, L.W., Lund, K., Sutter, J.F., Balcer, D.E., and Evans, K.V., 1995, An 40Ar/39Ar Chronicle of the Tectonic Development of the Salmon River Suture Zone, Western Idaho, in Vallier, T.L., and Brooks, H.C., ed., Geology of the Blue Mountains Region of Oregon, Idaho, and Washington: Petrology and Tectonic Evolution of Pre-Tertiary Rocks of the Blue Mountains Region: U.S. Geological Survey Profess…
Wells, M.L., Beyene, M.A., Spell, T.L., Kula, J.L., Miller, D.M., and Zanetti, K.A., 2005, The Pinto shear zone; a Laramide synconvergent extensional shear zone in the Mojave Desert region of the southwestern United States: Journal of Structural Geology, v. 27, p. 1697–1720.
Figure 14
Alberts, D.G., 2019, U-Pb and Hf isotopic analysis of detrital zircons from Paleozoic and Cretaceous strata of southern Vancouver Island, British Columbia. [M.Sc. thesis]: University of Arizona, Tuscon, 58 p.
Brown, E.H., and Gehrels, G.E., 2007, Detrital zircon constraints on terrane ages and affinities and timing of orogenic events in the San Juan Islands and North Cascades, Washington: Canadian Journal of Earth Sciences. v. 44. p. 1375–1396, doi:10.1139/E07-040.
Brown, E.H., Gehrels, and G.E., Valencia, V.A., 2010, Chilliwack composite terrane in northwest Washington: Neoproterozoic–Silurian passive margin basement, Ordovician–Silurian arc inception: Canadian Journal of Earth Sciences, v. 47, p. 1347–1366.
Doughty, P.T., and Chamberlain, K.R., 1996, Salmon River Arch revisited: new evidence for 1370 Ma rifting near the end of deposition in the Middle Proterozoic Belt basin: Canadian Journal of Earth Sciences, v. 33, p. 1037–1052, doi:10.1139/e96-079.
Evans, K.V., and Zartman, R.E., 1990, U-Th-Pb and Rb-Sr geochronology of middle Proterozoic granite and augen gneiss, Salmon River Mountains, east-central Idaho: Geological Society of America Bulletin, v. 102, p. 63–73.
LaMaskin, T.A., Vervoort, J.D., Dorsey, R.J., and Wright, J.E., 2011, Early Mesozoic paleogeography and tectonic evolution of the western United States: Insights from detrital zircon U-Pb geochronology, Blue Mountains Province, northeastern Oregon: Geological Society of America Bulletin, v. 123, p. 1939–1965.
Lemieux, Y., Thompson, R., Erdmer, P., Simonetti, A., and Creaser, R., 2007, Detrital zircon geochronology and provenance of Late Proterozoic and mid-Paleozoic successions outboard of the miogeocline, southeastern Canadian Cordillera: Canadian Journal of Earth Sciences, v. 44, p. 1675–1693, doi:10.1139/E07-048.
Lewis, R.S., Vervoort, J.D., Burmester, R.F., and Oswald, P.J., 2010, Detrital zircon analysis of Mesoproterozoic and Neoproterozoic metasedimentary rocks of north-central Idaho: implications for development of the Belt-Purcell basin: Canadian Journal of Earth Sciences, v. 47, p. 1383–1404, doi:10.1139/E10-049.
Link, P.K., Fanning, C.M., Lund, K.I., and Aleinikoff, J.N., 2007, Detrital-zircon populations and provenance of Mesoproterozoic strata of east-central Idaho, U.S.A.: correlation with Belt Supergroup of southwest Montana, in Link, P.K., and Lewis, R.S., eds., Proterozoic geology of western North America and Siberia: Society of Economic Paleontologists and Mineralogists Special Publication 86, p. …
Link, P.K., Todt, M.K., Pearson, D.M., and Thomas, R.C., 2017, 500–490 Ma detrital zircons in Upper Cambrian Worm Creek and correlative sandstones, Idaho, Montana, and Wyoming: Magmatism and tectonism within the passive margin: Lithosphere, v. 9, p. 910–926.
Ma, C., Bergeron, P., Foster, D.A., Dutrow, B.L., Mueller, P.A., and Allen, C., 2016, Detrital-zircon geochronology of the Sawtooth metamorphic complex, Idaho: evidence for metamorphosed lower Paleozoic shelf strata within the Idaho batholith: Geosphere, v. 12, p. 1136–1153.
Mihalynuk, M.G., Diakow, L.J., Friedman, R.M., and Logan, J.M., 2016, Chronology of southern Nicola arc stratigraphy and deformation, in Geological Fieldwork 2015, British Columbia Ministry of Energy and Mines: British Columbia Geological Survey Paper 2016-1, p. 31–63.
Ross, G.M., and Villeneuve, M., 2003, Provenance of the Mesoproterozoic (1.45 Ga) Belt basin (western North America): another piece in the pre-Rodinia paleogeographic puzzle: Geological Society of America Bulletin, v. 115, p. 1191–1217.
Schermer, E.R., Hoffnagle, E.A., Brown, E.H., Gehrels, G.E., and McClelland, W.C., 2018, U-Pb and Hf isotopic evidence for an Arctic origin of terranes in northwestern Washington: Geosphere, v.14, p. 835–860.
